# Supplementary material for: Fleas of black rats (Rattus rattus) as reservoir host of Bartonella spp. in Chile
Source: PubMed Central journal article supplement (PMC6679904; doi:10.7717/peerj.7371), 2019-08-01
Supplement: peerj-07-7371-s002.pdf [file peerj-07-7371-s002.pdf]

Supplement file 1. AlignmentGLTA.fasta

```
>II124a_Bart_gltA
ATTTGCATGTATCGCAGCAGGTGTTGCATGTCTTTGGGGACCAGCGCATG
GAGGAGCTAATGAAGCATGCTTAAAAATGCTCCAAG--AAAT-AGGTTC
TGTGAAAAAATTCCTGAATTTATTACTC-----GTGCAA
>III57a_Bart_gltA
GTTTGCATGCATTGCTGCAGGTGTTGCTTGTCTTTGGGGACCAGCGCATG
GAGGAGCTAATGAAGCATGTCTGAAAATGCTACAAG--AAAT-AGGGGA
CGTAAAAAGAATTCCTGAATTTATTGCGC-----GTGCCAA
>III81d_Bart_gltA
GTTTGCCTGTATTGCAGCAGGTGTTGCCTGTCTTTGGGGACCTGCACATG
GGGGTGCCAATGAAGCCTGCTTAAAAATGTTACAAG--AAAT-AGGCTC
AGTTGAGCAAATTCAAAATTCATTGCAC-----GAGCAA
>III82d_Bart_gltA
GTTTGCCTGTATTGCAGCAGGTGTTGCCTGTCTTTGGGGACCTGCACATG
GGGGTGCCAATGAAGCCTGCTTAAAAATGTTACAAG--AAAT-AGGCTC
AGTTGAGCAAATTCAAAATTCATTGCAC-----GAGCAA
>IV160a_Bart_gltA
GTTTGCCTGTATTGCAGCAGGTGTTGCATGCCTTTGGGGACCAGCACATG
GTGGCGCCAATGAAGCATGTCTAAAAATGCTACAGG--AAAT-TGGTTC
TATTAAGAATTCCTGAATTTATTGCTC-----GTGCAA
>IV160e_Bart_gltA
GTTTGCCTGTATTGCAGCAGGTGTTGCATGCCTTTGGGGACCAGCCATG
GTGGTGCCAATGAAGCATGCCTAAAAATGCTACAAG--AGAT-AGGTTC
TATTAAGAATTCCTGAATTTATTGCTC-----GTGCAA
>IV160j_Bart_gltA
GTTTGCCTGTATTGCAGCAGGTGTTGCATGCCTTTGGGGACCAGCACATG
GTGGCGCCAATGAAGCATGTCTAAAAATGCTACAGG--AAAT-TGGTTC
TATTAAGAATTCCTGAATTTATTGCTC-----GTGCAA
>IV160k_Bart_gltA
GTTTGCCTGTATTGCAGCAGGTGTTGCATGCCTTTGGGGACCAGCACATG
GTGGCGCCAATGAAGCATGTCTAAAAATGCTACAGG--AAATATGGTTC
TATTAAGAATTCCTGAATTTATTGCTC-----GTGCAA
>IV70a_Bart_gltA
GTTTGCCTGTATTGCAGCAGGTGTTGCCTGTCTTTGGGGACCTGCACATG
GGGGTGCCAATGAAGCCTGCTTAAAAATGTTACAAG--AAAT-AGGCTC
AGTTGAGCAAATTCAAAATTCATTGCAC-----GAGCAA
>IV70b_Bart_gltA
GTTTGCCTGTATTGCAGCAGGTGTTGCCTGTCTTTGGGGACCTGCACATG
GGGGTGCCAATGAAGCCTGCTTAAAAATGTTACAAG--AAAT-AGGCTC
AGTTGAGCAAATTCAAAATTCATTGCAC-----GAGCAA
>IV70e_Bart_gltA
GTTTGCCTGTATTGCAGCAGGTGTTGCCTGTCTTTGGGGACCTGCACATG
GGGGTGCCAATGAAGCCTGCTTAAAAATGTTACAAG--AAAT-AGGCTC
AGTTGAGCAAATTCAAAATTCATTGCAC-----GAGCAA
>IV77a_Bart_gltA
GTTTGCCTGTATTGCAGCAGGTGTTGCCTGTCTTTGGGGACCTGCACATG
GGGGTGCCAATGAAGCCTGCTTAAAAATGTTACAAG--AAAT-AGGCTC
AGTTGAGCAAATTCAAAATTCATTGCAC-----GAGCAA
>IV81b_Bart_gltA
GTTTGCCTGTATTGCAGCAGGTGTTGCCTGTCTTTGGGGACCTGCACATG
GGGGTGCCAATGAAGCCTGCTTAAAAATGTTACAAG--AAAT-AGGCTC
AGTTGAGCAAATTCAAAATTCATTGCAC-----GAGCAA
```

Supplement file 1. AlignmentGLTA.fasta

>V23a\_Bart\_gltA

GTTTGCTTGTATTGCAGCAGGTGTTGCATGCCTTTGGGGACCCGCACATG  
GTGGTGCCAATGAAGCATGTCTAAAAATGCTACAAG---AAAT-AGGTTC  
TATTAAGAATTCTGAATTTATTGCAC-----GTGCAA

>V23c\_Bart\_gltA

GTTTGCTTGTATTGCAGCAGGTGTTGCATGCCTTTGGGGACCCGCACATG  
GTGGTGCCAATGAAGCATGTCTAAAAATGCTACAAG---AAAT-AGGTTC  
TATTAAGAATTCTGAATTTATTGCAC-----GTGCAA
