# Supplementary material for: Fleas of black rats (Rattus rattus) as reservoir host of Bartonella spp. in Chile
Source: PubMed Central journal article supplement (PMC6679904; doi:10.7717/peerj.7371), 2019-08-01
Supplement: peerj-07-7371-s003.pdf [file peerj-07-7371-s003.pdf]

Supplement file 2. AlignmentRPOB.fasta

```
>II124a_Bart_rpoB
AAACAGCTTGGTTTCAGTAGCTGCTGCGCTTATTCCATTTTTAGAAAATGA
TGATGCGAATCGTGCATTGATGGGATCAAATATGCAGCGTCAGGC
>III57a_Bart_rpoB
AAGCAGTTGGTTTCAGTAGCAGCAGCTCTTATTCCATTTTTGGAAAATGA
TGATGCGAATCGTGCATTGATGGGATCAAACATGCAACGTCAGGC
>III81d_Bart_rpoB
AAGCAGTTGGTTTCTGTGGCAGCTGCTCTTATTCCGTTTTTTGGAAAATGA
TGATGCGAATCGTGCATTGATGGGATCAAATATGCAGCGTCAAGC
>III82d_Bart_rpoB
AAGCAGTTGGTTTCTGTGGCAGCTGCTCTTATTCCGTTTTTTGGAAAATGA
TGATGCGAATCGTGCATTGATGGGATCAAATATGCAGCGTCAAGC
>IV160a_Bart_rpoB
AAACAGTTGGTTTCAGTTGCAGCTGCGCTTATTCCCTTTTTGGAAAATGA
TGATGCGAATCGTGCATTGATGGGATCAAACATGCAGCGTCAGGC
>IV160e_Bart_rpoB
AAACAGTTGGTTTCGTTGCAGCCGCACTTATTCCGTTTTTTAGAAAATGA
TGATGCGAATCGTGCCTTATGGGATCGAACATGCAGCGTCAGGC
>IV160j_Bart_rpoB
AAACAGTTGGTTTCAGTTGCAGCTGCGCTTATTCCCTTTTTGGAAAATGA
TGATGCGAATCGTGCATTGATGGGATCAAACATGCAGCGTCAGGC
>IV160k_Bart_rpoB
AAACAGTTGGTTTCAGTTGCAGCTGCGCTTATTCCCTTTTTGGAAAATGA
TGATGCGAATCGTGCATTGATGGGATCAAACATGCAGCGTCAGGC
>IV70a_Bart_rpoB
AAGACGTTGGTTTCTGTGGCAGCTGCTCTTATTCCGTTTTTTGGAAAATGA
TGATGCGAATCGTGCATTGATGGGATCAAATATGCAGCGTCAAGC
>IV70b_Bart_rpoB
AAGCAGTTGGTTTCTGTGGCAGCTGCTCTTATTCCGTTTTTTGGAAAATGA
TGATGCGAATCGTGCATTGATGGGATCAAATATGCAGCGTCAAGC
>IV70e_Bart_rpoB
AAGCAGTTGGTTTCTGTGGCAGCTGCTCTTATTCCGTTTTTTGGAAAATGA
TGATGCGAATCGTGCATTGATGGGATCAAATATGCAGCGTCAAGC
>IV77a_Bart_rpoB
AAGCAGTTGGTTTCTGTGGCAGCTGCTCTTATTCCGTTTTTTGGAAAATGA
TGATGCGAATCGTGCATTGATGGGATCAAATATGCAGCGTCAAGC
>IV81b_Bart_rpoB
AAGCAGTTGGTTTCTGTGGCAGCTGCTCTTATTCCGTTTTTTGGAAAATGA
TGATGCGAATCGTGCATTGATGGGATCAAATATGCAGCGTCAAGC
>V23a_Bart_rpoB
AAACAGTTGGTTTCAGTTGCAGCTGCGCTTATTCCCTTTTTGGAAAATGA
TGATGCGAATCGTGCATTGATGGGATCAAACATGCAGCGTCAGGC
>V23c_Bart_rpoB
AAACAGTTGGTTTCAGTTGCAGCTGCGCTTATTCCCTTTTTGGAAAATGA
TGATGCGAATCGTGCATTGATGGGATCAAACATGCAGCGTCAGGC
```
