# Supplementary material for: Fleas of black rats (Rattus rattus) as reservoir host of Bartonella spp. in Chile
Source: PeerJ. 2019 Aug 1;7:e7371. doi: 10.7717/peerj.7371 (PMC6679904; doi:10.7717/peerj.7371)
Supplement: Supplemental Information 4 — The first column corresponds to the reference sequences of GenBank and the first row, the samples analyzed from our study. [file peerj-07-7371-s004.xls]

## Sheet: MatrixOutput
		1	2	3	4	5	6	7	8	9	10	11	12	13	14	15	16	17	18	19	20	21	22	23	24	25	26	27	29	30	31	32	33	34	35	36	37	38	39	40	41	42	43	44	45	46	47
1	B. alsatica		0.0402505	0.0640328	0.0256516	0.0203781	0.0329352	0.0308492	0.0345543	0.0255787	0.0315693	0.0237259	0.0204977	0.0229326	0.0268082	0.0213028	0.0227233	0.0332715	0.0292332	0.0228494	0.0339711	0.0324727	0.0220817	0.0223982	0.0177292	0.0184883	0.0170243	0.0276639	0.0231754	0.0220554	0.0194421	0.0230234	0.0271148	0.0299097	0.0313984	0.0313984	0.0211609	0.0210427	0.0211609	0.0204121	0.0329489	0.0313984	0.0313984	0.0313984	0.0313984	0.0225801	0.0225801
2	B. ancashensis	0.190616		0.0600449	0.0350982	0.044019	0.0324488	0.0315798	0.0341287	0.0420304	0.0304481	0.0294722	0.0313767	0.0286787	0.0328057	0.0347117	0.0293984	0.0405801	0.0399667	0.0354662	0.0373712	0.0308481	0.0370028	0.0322218	0.0388749	0.039041	0.0367952	0.034918	0.0416414	0.0299279	0.0364844	0.042899	0.0338707	0.0355011	0.0385423	0.0385423	0.0290782	0.0300392	0.0290782	0.028695	0.040358	0.0385423	0.0385423	0.0385423	0.0385423	0.0331195	0.0331195
3	B. australis	0.340002	0.321363		0.0564931	0.0593796	0.0548647	0.0505948	0.0522398	0.0696197	0.049652	0.0775471	0.0551047	0.0585249	0.0628099	0.0544872	0.056734	0.0700697	0.057257	0.0582787	0.0582332	0.0462735	0.0632356	0.0541483	0.0583353	0.0625259	0.0596886	0.0689824	0.0790845	0.0685122	0.0648134	0.0767985	0.0524016	0.0570637	0.0639622	0.0639622	0.0595763	0.0712039	0.0595763	0.0586745	0.0665756	0.0639622	0.0639622	0.0639622	0.0639622	0.0561089	0.0561089
4	B. bacilliformis	0.109611	0.165995	0.299789		0.0302794	0.0290635	0.0277562	0.0282563	0.0327782	0.0300882	0.0294495	0.0275378	0.023893	0.0264383	0.0280428	0.0236574	0.0326163	0.0343102	0.0352007	0.0288787	0.0284839	0.0275889	0.0271825	0.0317989	0.0304705	0.0283543	0.0309801	0.0350818	0.0266841	0.0278704	0.03586	0.0311434	0.027618	0.0338316	0.0338316	0.0254869	0.0277986	0.0254869	0.0245212	0.0354741	0.0338316	0.0338316	0.0338316	0.0338316	0.0273628	0.0273628
5	B. birtlesii	0.077187	0.219231	0.319223	0.139477		0.0395879	0.0338667	0.0354693	0.032211	0.0287598	0.0319772	0.0275799	0.0272934	0.0317216	0.0298066	0.0253485	0.0355661	0.0315034	0.0316224	0.0420658	0.0341238	0.02708	0.0274151	0.0270825	0.0255957	0.0260236	0.0320751	0.0315741	0.0280573	0.0251194	0.0328555	0.0303697	0.0310846	0.0356109	0.0356109	0.0269477	0.0268666	0.0269477	0.0261986	0.0371553	0.0356109	0.0356109	0.0356109	0.0356109	0.0275495	0.0275495
6	B. bovis	0.148248	0.147161	0.284334	0.128438	0.189039		0.0214418	0.032836	0.044612	0.0359173	0.0294154	0.0277377	0.0301568	0.0300323	0.0351128	0.029307	0.0387288	0.0392424	0.0309756	0.0319443	0.020479	0.034843	0.0263402	0.0392043	0.0405988	0.0360804	0.0380651	0.0413194	0.027439	0.0397118	0.0382027	0.0316445	0.0429653	0.0368944	0.0368944	0.0311628	0.02957	0.0311628	0.0303447	0.0385387	0.0368944	0.0368944	0.0368944	0.0368944	0.0269151	0.0269151
7	B. chomelii	0.140395	0.146115	0.264553	0.122838	0.15866	0.0822779		0.0312289	0.0391101	0.0325898	0.0326022	0.0282519	0.030213	0.0376908	0.0301472	0.0293499	0.038318	0.0344653	0.0380388	0.0301026	0.00952563	0.0269035	0.0298732	0.0364894	0.037187	0.0325794	0.0397875	0.0397672	0.031076	0.0366238	0.0370009	0.0332872	0.0412275	0.0336329	0.0336329	0.0302395	0.0321048	0.0302395	0.0295307	0.0351279	0.0336329	0.0336329	0.0336329	0.0336329	0.0293532	0.0293532
8	B. clarridgeiae	0.170923	0.168355	0.285759	0.131119	0.172851	0.150396	0.144484		0.0449568	0.0327171	0.0387926	0.0327081	0.028635	0.0349869	0.0324395	0.0320334	0.0301524	0.0432445	0.0335126	0.0172216	0.0318192	0.0351123	0.0298723	0.0364922	0.0365836	0.0337208	0.0391174	0.0413974	0.0342154	0.0345656	0.0410845	0.0332445	0.0389879	0.040488	0.040488	0.0351847	0.0354986	0.0351847	0.0344003	0.0423102	0.040488	0.040488	0.040488	0.040488	0.0321257	0.0321257
9	B. coopersplainsensis	0.108314	0.213557	0.374402	0.15803	0.150954	0.223261	0.192858	0.235392		0.0427515	0.0329842	0.0308754	0.0279578	0.0312501	0.0301518	0.0343175	0.0344947	0.0203151	0.0356638	0.047876	0.0410026	0.0341156	0.0329288	0.0301078	0.0283408	0.0330877	0.0324026	0.0334047	0.0324393	0.0259195	0.033619	0.0419845	0.0374062	0.0174214	0.0174214	0.0315596	0.0322725	0.0315596	0.0306929	0.0191067	0.0174214	0.0174214	0.0174214	0.0174214	0.0323864	0.0323864
10	B. doshiae	0.140467	0.143116	0.27062	0.138878	0.127326	0.173223	0.151151	0.156328	0.213741		0.0388584	0.0346977	0.0252195	0.0314629	0.0292581	0.0331157	0.0318754	0.0391406	0.0355309	0.0327676	0.030338	0.0258326	0.0317044	0.0315097	0.033078	0.0305142	0.0317429	0.0340629	0.0356622	0.0317509	0.0339484	0.0175779	0.028547	0.0384722	0.0384722	0.0320427	0.0385525	0.0320427	0.0313727	0.0403593	0.0384722	0.0384722	0.0384722	0.0384722	0.0325935	0.0325935
11	B. elizabethae	0.101981	0.12811	0.400072	0.137293	0.151733	0.132204	0.157739	0.196879	0.162123	0.194018		0.0186173	0.025025	0.0268823	0.0290143	0.0190627	0.0405025	0.0353417	0.0238335	0.0382315	0.0342606	0.0291924	0.0231702	0.0315751	0.0305109	0.0305723	0.0252333	0.0321018	0.0111767	0.0289394	0.0344994	0.0323952	0.0347261	0.0382287	0.0382287	0.0166731	0.0121429	0.0166731	0.0164955	0.0402115	0.0382287	0.0382287	0.0382287	0.0382287	0.0227848	0.0227848
12	B. grahamii	0.0804333	0.146161	0.29193	0.130171	0.121023	0.124894	0.130518	0.161634	0.143758	0.170071	0.0700321		0.0216889	0.0232625	0.0238643	0.0150343	0.0343588	0.0286254	0.0196733	0.0333699	0.0286535	0.0246331	0.016499	0.0292764	0.027746	0.0281036	0.025737	0.0280259	0.0158495	0.0259	0.0278358	0.0317305	0.0311298	0.0309225	0.0309225	0.0160378	0.0162012	0.0160378	0.0152822	0.032559	0.0309225	0.0309225	0.0309225	0.0309225	0.0148673	0.0148673
13	B. henselae	0.0925066	0.126683	0.311409	0.0984043	0.121049	0.129316	0.134826	0.131681	0.126014	0.108397	0.113251	0.090548		0.0120179	0.0202978	0.0219707	0.021406	0.0246488	0.0257962	0.0299021	0.0290727	0.02064	0.0235493	0.0254845	0.0264399	0.0244649	0.0211056	0.0253217	0.0227048	0.0218051	0.027252	0.0248587	0.0306869	0.0270192	0.0270192	0.0223974	0.0247428	0.0223974	0.0216793	0.0286419	0.0270192	0.0270192	0.0270192	0.0270192	0.0233132	0.0233132
14	B. koehlerae	0.116407	0.152898	0.331741	0.112013	0.146955	0.129211	0.176858	0.169984	0.14525	0.146211	0.125285	0.101681	0.0311132		0.0245294	0.0243004	0.0257442	0.026618	0.0286713	0.038058	0.0364315	0.0254497	0.0273238	0.0295259	0.0297502	0.0294247	0.0231391	0.0269289	0.0244879	0.0261805	0.0288535	0.0311479	0.0368016	0.0303792	0.0303792	0.0256797	0.0267129	0.0256797	0.0249293	0.0320518	0.0303792	0.0303792	0.0303792	0.0303792	0.02669	0.02669
15	B. phoceensis	0.0811726	0.169817	0.288526	0.125982	0.133652	0.170838	0.137884	0.161517	0.138613	0.13671	0.135748	0.101654	0.0797924	0.10738		0.0249007	0.029031	0.0325735	0.0265421	0.0355354	0.0297106	0.0190764	0.0252495	0.0234432	0.0214803	0.0224679	0.0271942	0.0285723	0.0273743	0.0192989	0.0291131	0.0312854	0.0288184	0.0302104	0.0302104	0.0257313	0.0273687	0.0257313	0.0251244	0.0319186	0.0302104	0.0302104	0.0302104	0.0302104	0.0249127	0.0249127
16	B. queenslandensis	0.0963231	0.132946	0.295653	0.101413	0.113665	0.132266	0.137913	0.156218	0.169043	0.157891	0.0707103	0.0497738	0.0905262	0.107394	0.106781		0.032882	0.0310101	0.0236833	0.0328992	0.0288436	0.028429	0.0178746	0.0307492	0.0295375	0.0297013	0.0266921	0.0330331	0.015396	0.026805	0.0340654	0.0314641	0.0305792	0.0338889	0.0338889	0.0118623	0.0164637	0.0118623	0.0108485	0.0357728	0.0338889	0.0338889	0.0338889	0.0338889	0.0166864	0.0166864
17	B. quintana	0.149262	0.192115	0.36451	0.149461	0.167915	0.178414	0.176817	0.1431	0.165802	0.146186	0.201621	0.169957	0.0817142	0.104904	0.132916	0.157799		0.0340249	0.0330794	0.0319703	0.0368469	0.0272204	0.0357543	0.0312383	0.0313052	0.0305241	0.0254788	0.035787	0.0370859	0.0282121	0.0354108	0.0347492	0.0415903	0.0330855	0.0330855	0.0358981	0.0401436	0.0358981	0.0351985	0.0346625	0.0330855	0.0330855	0.0330855	0.0330855	0.037828	0.037828
18	B. rattaustraliani	0.127298	0.199022	0.313702	0.165831	0.145047	0.19275	0.164657	0.228227	0.0722517	0.191576	0.176758	0.131529	0.102437	0.114232	0.150911	0.149462	0.164637		0.0388464	0.0445191	0.03627	0.030308	0.0304176	0.034249	0.0325099	0.0336428	0.0301941	0.036991	0.0321451	0.028953	0.0372214	0.039121	0.0376917	0.022049	0.022049	0.0304616	0.0323069	0.0304616	0.0296135	0.0237027	0.022049	0.022049	0.022049	0.022049	0.0314481	0.0314481
19	B. rattimassiliensis	0.0924559	0.162122	0.305495	0.165995	0.142245	0.140442	0.181575	0.157891	0.172967	0.167016	0.1024	0.0761715	0.109564	0.128209	0.119199	0.102429	0.152873	0.188936		0.0343709	0.0357597	0.0255715	0.0211239	0.0297322	0.0281219	0.0276075	0.0255036	0.0310884	0.021256	0.0280281	0.033429	0.0299744	0.0374543	0.0385825	0.0385825	0.0240451	0.0229584	0.0240451	0.023368	0.0401843	0.0385825	0.0385825	0.0385825	0.0385825	0.0197471	0.0197471
20	B. rochalimae	0.16596	0.184365	0.31385	0.132446	0.216274	0.145418	0.133075	0.0557955	0.247213	0.156378	0.196937	0.168476	0.139688	0.186712	0.177018	0.163047	0.151151	0.231312	0.164887		0.0315671	0.0371474	0.0318477	0.0396463	0.0412607	0.0363448	0.0405429	0.0392008	0.0336387	0.0386997	0.0359661	0.0329611	0.0403945	0.0426036	0.0426036	0.0360738	0.0349297	0.0360738	0.0353582	0.0444717	0.0426036	0.0426036	0.0426036	0.0426036	0.0341257	0.0341257
21	B. schoenbuchensis	0.148218	0.140418	0.240362	0.128411	0.159728	0.0772905	0.0219696	0.150373	0.207108	0.138783	0.165722	0.131054	0.129289	0.170901	0.137264	0.13225	0.170857	0.177918	0.168188	0.145391		0.0262304	0.0279659	0.0380521	0.0390088	0.033848	0.0388558	0.0418193	0.0326647	0.0357254	0.0387598	0.0336713	0.0390343	0.0353364	0.0353364	0.0304566	0.0349921	0.0304566	0.0297679	0.036909	0.0353364	0.0353364	0.0353364	0.0353364	0.027438	0.027438
22	B. taylorii	0.0828468	0.175341	0.329454	0.121917	0.11711	0.162189	0.114886	0.170838	0.159777	0.108881	0.137182	0.10295	0.0766773	0.10567	0.0697785	0.130938	0.116345	0.133676	0.105656	0.180368	0.109509		0.0285965	0.0259008	0.0251609	0.0226879	0.0244946	0.0259735	0.0297031	0.0186318	0.0255456	0.0278355	0.0284626	0.0348603	0.0348603	0.0295686	0.0285544	0.0295686	0.0289243	0.0366318	0.0348603	0.0348603	0.0348603	0.0348603	0.0286401	0.0286401
23	B. tribocorum	0.0914756	0.151083	0.282566	0.124922	0.121011	0.118833	0.1431	0.142103	0.151985	0.151176	0.0966755	0.0551133	0.0967502	0.120414	0.107387	0.0648312	0.171888	0.139405	0.0862983	0.155009	0.131039	0.127357		0.0297415	0.0291652	0.0271719	0.0281359	0.0325642	0.020306	0.0276525	0.0320859	0.0288703	0.0296623	0.0350118	0.0350118	0.0154765	0.0215352	0.0154765	0.0145884	0.0368522	0.0350118	0.0350118	0.0350118	0.0350118	0.0107505	0.0107505
24	B. v. arupensis	0.0650932	0.191576	0.323551	0.150373	0.120978	0.192897	0.176963	0.18789	0.137264	0.149599	0.154807	0.137946	0.108336	0.132962	0.0976252	0.14837	0.144391	0.157704	0.139439	0.204659	0.185361	0.11017	0.137929		0.0117755	0.0128363	0.0288254	0.0274807	0.0310515	0.0223103	0.0271959	0.0316574	0.0300232	0.0354205	0.0354205	0.0278561	0.0299933	0.0278561	0.0271383	0.0369813	0.0354205	0.0354205	0.0354205	0.0354205	0.0279705	0.0279705
25	B. v. berkhoffii	0.0696087	0.19588	0.348668	0.143116	0.113188	0.204546	0.183152	0.18864	0.13045	0.160948	0.14726	0.130052	0.113744	0.137237	0.085851	0.141136	0.148886	0.150133	0.130938	0.2136	0.196937	0.108252	0.136202	0.0309714		0.015141	0.0304335	0.0302531	0.0298123	0.0187106	0.0298112	0.0310369	0.027264	0.0335805	0.0335805	0.0278138	0.0298056	0.0278138	0.0270121	0.0352872	0.0335805	0.0335805	0.0335805	0.0335805	0.0275711	0.0275711
26	B. v. vinsonii	0.0597132	0.177918	0.331783	0.130531	0.114199	0.177018	0.155473	0.173311	0.156161	0.142531	0.147878	0.130984	0.10203	0.132204	0.0914248	0.141631	0.138613	0.156837	0.1259	0.188721	0.162978	0.0918871	0.119762	0.0356785	0.0497657		0.02851	0.0282675	0.0299407	0.0215689	0.0278576	0.0307178	0.0308771	0.0392536	0.0392536	0.0271202	0.0289964	0.0271202	0.0263103	0.0408798	0.0392536	0.0392536	0.0392536	0.0392536	0.0286935	0.0286935
27	B. washoensis	0.121784	0.165675	0.355875	0.141398	0.152686	0.176777	0.190448	0.19798	0.156128	0.147059	0.10878	0.118764	0.081191	0.0924223	0.124748	0.119711	0.104124	0.143575	0.113687	0.200488	0.184315	0.103462	0.130949	0.130918	0.14197	0.130414		0.0318419	0.0225973	0.0259396	0.0341515	0.0316325	0.0337327	0.0379586	0.0379586	0.0261635	0.0246848	0.0261635	0.0255199	0.0394785	0.0379586	0.0379586	0.0379586	0.0379586	0.0276851	0.0276851
29	C. B. fadhilae	0.0930127	0.198203	0.409294	0.171888	0.141131	0.196828	0.187615	0.205604	0.157739	0.163786	0.151745	0.121036	0.107806	0.11972	0.125839	0.151802	0.165653	0.172697	0.135567	0.192785	0.196786	0.109424	0.151855	0.125857	0.14296	0.131475	0.150898		0.0306805	0.0295972	0.0096612	0.0372635	0.03694	0.0327215	0.0327215	0.0319021	0.029859	0.0319021	0.031299	0.0341507	0.0327215	0.0327215	0.0327215	0.0327215	0.0325336	0.0325336
30	C. B. mastomydis	0.0910657	0.133767	0.355914	0.119296	0.126516	0.120414	0.145209	0.169087	0.156179	0.173033	0.0265871	0.0548698	0.0963491	0.107806	0.123986	0.0503254	0.180227	0.156851	0.0858745	0.169135	0.152923	0.13787	0.0804181	0.1489	0.141335	0.142007	0.0918809	0.139359		0.0272513	0.0329476	0.0294165	0.0328124	0.0340792	0.0340792	0.0175317	0.00747846	0.0175317	0.0167474	0.0357317	0.0340792	0.0340792	0.0340792	0.0340792	0.0189405	0.0189405
31	C. B. mayotimonensis	0.070727	0.177892	0.346078	0.125378	0.104793	0.194094	0.177918	0.169043	0.113234	0.15027	0.136139	0.113723	0.0858915	0.114874	0.0703319	0.123986	0.125889	0.132119	0.121023	0.198081	0.17183	0.0654062	0.119751	0.0878832	0.0700203	0.0816413	0.1132	0.132852	0.124338		0.0290782	0.0322174	0.0221205	0.0317209	0.0317209	0.0270644	0.0283154	0.0270644	0.0263075	0.0333632	0.0317209	0.0317209	0.0317209	0.0317209	0.0272577	0.0272577
32	C. B. sanaae	0.0885702	0.206258	0.396904	0.174236	0.143291	0.181538	0.172851	0.205638	0.152806	0.158769	0.165576	0.121049	0.114911	0.127312	0.127261	0.15866	0.160814	0.167849	0.14913	0.178001	0.181502	0.10482	0.147014	0.120999	0.137822	0.126526	0.159626	0.0218558	0.152767	0.128083		0.0372415	0.0366198	0.0332017	0.0332017	0.0328245	0.0321395	0.0328245	0.0322563	0.0348043	0.0332017	0.0332017	0.0332017	0.0332017	0.0323551	0.0323551
33	II124a	0.120477	0.162321	0.287189	0.144701	0.139458	0.151283	0.15712	0.162396	0.212565	0.0562413	0.156977	0.155669	0.107921	0.145365	0.148974	0.150351	0.16596	0.190554	0.138761	0.162451	0.15806	0.120429	0.137394	0.155582	0.153988	0.148453	0.146138	0.179103	0.137999	0.156238	0.174199		0.031586	0.0403264	0.0403264	0.0284907	0.0316497	0.0284907	0.0277222	0.0422944	0.0403264	0.0403264	0.0403264	0.0403264	0.029964	0.029964
34	III57a	0.132979	0.174483	0.31883	0.123804	0.144317	0.220374	0.211141	0.201698	0.182321	0.135541	0.173219	0.148974	0.13734	0.178001	0.125889	0.147317	0.205674	0.183084	0.177972	0.211299	0.197035	0.126574	0.136237	0.133767	0.119199	0.139422	0.161455	0.178933	0.160424	0.0862668	0.174009	0.148485		0.0408639	0.0408639	0.028962	0.0338863	0.028962	0.0281836	0.0426529	0.0408639	0.0408639	0.0408639	0.0408639	0.0293535	0.0293535
35	III81d	0.149547	0.201587	0.355659	0.168425	0.175088	0.182375	0.162192	0.209159	0.0597153	0.194372	0.201474	0.147975	0.124053	0.142504	0.143631	0.173262	0.162174	0.0914197	0.19798	0.219113	0.175263	0.169817	0.174503	0.170763	0.162881	0.196852	0.194963	0.156083	0.173806	0.149488	0.156097	0.20264	0.204478		6.31733e-17	0.0331765	0.0353375	0.0331765	0.0324084	0.00599062	6.31733e-17	6.31733e-17	6.31733e-17	6.31733e-17	0.0326848	0.0326848
36	III82d	0.149547	0.201587	0.355659	0.168425	0.175088	0.182375	0.162192	0.209159	0.0597153	0.194372	0.201474	0.147975	0.124053	0.142504	0.143631	0.173262	0.162174	0.0914197	0.19798	0.219113	0.175263	0.169817	0.174503	0.170763	0.162881	0.196852	0.194963	0.156083	0.173806	0.149488	0.156097	0.20264	0.204478	0		0.0331765	0.0353375	0.0331765	0.0324084	0.00599062	6.31733e-17	6.31733e-17	6.31733e-17	6.31733e-17	0.0326848	0.0326848
37	IV160a	0.085551	0.127357	0.313368	0.112596	0.120307	0.144484	0.143705	0.176121	0.149563	0.15201	0.0553827	0.0548721	0.0958291	0.118782	0.112835	0.0309731	0.177972	0.143619	0.10294	0.183352	0.144463	0.137884	0.0498965	0.130043	0.129281	0.123729	0.119191	0.145999	0.0602098	0.124346	0.152786	0.131646	0.135274	0.167052	0.167052		0.0184777	6.39633e-17	0.00413777	0.0350738	0.0331765	0.0331765	0.0331765	0.0331765	0.0150214	0.0150214
38	IV160e	0.0855415	0.13375	0.367279	0.125392	0.120289	0.132997	0.151895	0.176069	0.156161	0.18783	0.0312924	0.0548676	0.107833	0.119751	0.123979	0.055388	0.195338	0.156837	0.0971249	0.176121	0.166917	0.131506	0.0858799	0.142468	0.141327	0.135778	0.103462	0.139346	0.0130462	0.130423	0.152749	0.151128	0.167036	0.180707	0.180707	0.0654167		0.0184777	0.017669	0.0369622	0.0353375	0.0353375	0.0353375	0.0353375	0.0200846	0.0200846
39	IV160j	0.085551	0.127357	0.313368	0.112596	0.120307	0.144484	0.143705	0.176121	0.149563	0.15201	0.0553827	0.0548721	0.0958291	0.118782	0.112835	0.0309731	0.177972	0.143619	0.10294	0.183352	0.144463	0.137884	0.0498965	0.130043	0.129281	0.123729	0.119191	0.145999	0.0602098	0.124346	0.152786	0.131646	0.135274	0.167052	0.167052	-5.55112e-17	0.0654167		0.00413777	0.0350738	0.0331765	0.0331765	0.0331765	0.0331765	0.0150214	0.0150214
40	IV160k	0.0804181	0.126602	0.305495	0.107112	0.114833	0.138719	0.137929	0.169957	0.143705	0.146186	0.0550874	0.0500862	0.0905313	0.11326	0.107374	0.0264406	0.17183	0.137845	0.097658	0.177108	0.138699	0.13219	0.045156	0.124363	0.123534	0.118088	0.113687	0.140258	0.0553938	0.118747	0.146974	0.126014	0.129466	0.160917	0.160917	0.00426451	0.0605523	0.00426451		0.0342346	0.0324084	0.0324084	0.0324084	0.0324084	0.0141435	0.0141435
41	IV70a	0.161517	0.214953	0.373435	0.180904	0.187704	0.195161	0.174483	0.222702	0.0696134	0.207579	0.214834	0.160062	0.135541	0.154372	0.155428	0.185997	0.174463	0.10197	0.211072	0.232792	0.18789	0.182228	0.187162	0.183152	0.175138	0.209961	0.208124	0.168191	0.186499	0.161455	0.168206	0.215985	0.217764	0.00858417	0.00858417	0.179598	0.19355	0.179598	0.173278		0.00599062	0.00599062	0.00599062	0.00599062	0.0343087	0.0343087
42	IV70b	0.149547	0.201587	0.355659	0.168425	0.175088	0.182375	0.162192	0.209159	0.0597153	0.194372	0.201474	0.147975	0.124053	0.142504	0.143631	0.173262	0.162174	0.0914197	0.19798	0.219113	0.175263	0.169817	0.174503	0.170763	0.162881	0.196852	0.194963	0.156083	0.173806	0.149488	0.156097	0.20264	0.204478	0	0	0.167052	0.180707	0.167052	0.160917	0.00858417		6.31733e-17	6.31733e-17	6.31733e-17	0.0326848	0.0326848
43	IV70e	0.149547	0.201587	0.355659	0.168425	0.175088	0.182375	0.162192	0.209159	0.0597153	0.194372	0.201474	0.147975	0.124053	0.142504	0.143631	0.173262	0.162174	0.0914197	0.19798	0.219113	0.175263	0.169817	0.174503	0.170763	0.162881	0.196852	0.194963	0.156083	0.173806	0.149488	0.156097	0.20264	0.204478	0	0	0.167052	0.180707	0.167052	0.160917	0.00858417	0		6.31733e-17	6.31733e-17	0.0326848	0.0326848
44	IV77a	0.149547	0.201587	0.355659	0.168425	0.175088	0.182375	0.162192	0.209159	0.0597153	0.194372	0.201474	0.147975	0.124053	0.142504	0.143631	0.173262	0.162174	0.0914197	0.19798	0.219113	0.175263	0.169817	0.174503	0.170763	0.162881	0.196852	0.194963	0.156083	0.173806	0.149488	0.156097	0.20264	0.204478	0	0	0.167052	0.180707	0.167052	0.160917	0.00858417	0	0		6.31733e-17	0.0326848	0.0326848
45	IV81b	0.149547	0.201587	0.355659	0.168425	0.175088	0.182375	0.162192	0.209159	0.0597153	0.194372	0.201474	0.147975	0.124053	0.142504	0.143631	0.173262	0.162174	0.0914197	0.19798	0.219113	0.175263	0.169817	0.174503	0.170763	0.162881	0.196852	0.194963	0.156083	0.173806	0.149488	0.156097	0.20264	0.204478	0	0	0.167052	0.180707	0.167052	0.160917	0.00858417	0	0	0		0.0326848	0.0326848
46	V23a	0.0910841	0.151961	0.293748	0.124473	0.120327	0.119296	0.137308	0.155582	0.151105	0.157094	0.0914358	0.0453676	0.0963714	0.119798	0.107053	0.0548676	0.185361	0.145155	0.0757278	0.169215	0.125392	0.126602	0.0263518	0.125939	0.124363	0.130471	0.13045	0.146034	0.0700426	0.119218	0.146053	0.143188	0.135836	0.156198	0.156198	0.045156	0.0753499	0.045156	0.0404778	0.168313	0.156198	0.156198	0.156198	0.156198		6.4486e-17
47	V23c	0.0910841	0.151961	0.293748	0.124473	0.120327	0.119296	0.137308	0.155582	0.151105	0.157094	0.0914358	0.0453676	0.0963714	0.119798	0.107053	0.0548676	0.185361	0.145155	0.0757278	0.169215	0.125392	0.126602	0.0263518	0.125939	0.124363	0.130471	0.13045	0.146034	0.0700426	0.119218	0.146053	0.143188	0.135836	0.156198	0.156198	0.045156	0.0753499	0.045156	0.0404778	0.168313	0.156198	0.156198	0.156198	0.156198	0

## Sheet: Caption
Table. Estimates of Evolutionary Divergence between Sequences
The number of base substitutions per site from between sequences are shown. Standard error estimate(s) are shown above the diagonal. Analyses were conducted using the Tamura 3-parameter model [1]. The rate variation among sites was modeled with a gamma distribution (shape parameter = 1). The analysis involved 47 nucleotide sequences. Codon positions included were 1st+2nd+3rd+Noncoding. All positi…
1. Tamura K. (1992). Estimation of the number of nucleotide substitutions when there are strong transition-transversion and G + C-content biases. Molecular Biology and Evolution 9:678-687.
2. Kumar S., Stecher G., and Tamura K. (2016). MEGA7: Molecular Evolutionary Genetics Analysis version 7.0 for bigger datasets.Molecular Biology and Evolution 33:1870-1874.
Disclaimer: Although utmost care has been taken to ensure the correctness of the caption, the caption text is provided "as is" without any warranty of any kind. Authors advise the user to carefully check the caption prior to its use for any purpose and report any errors or problems to the authors immediately (www.megasoftware.net). In no event shall the authors and their employers be liable for a…
